# Supplementary material for: Thiophene Stability in Photodynamic Therapy: A Mathematical Model Approach
Source: MDPI journal article supplement (doi:10.3390/ijms25052528), 2024-02-21
Supplement: s1 [file s1]

## Supporting Information (SI)

# Thiophene Stability in Photodynamic Therapy: A Mathematical Model Approach

Jackson J. Alcázar

Centro de Química Médica, Facultad de Medicina Clínica Alemana, Universidad del Desarrollo, Santiago 7780272, Chile; jackson.alcazar@udd.cl

### Table of Contents

**Table S1.** Descriptors and Reactivities of 90 Thiophene Derivatives Calculated Based on Equations (1) and (3)..... 1

**Table S2.** Descriptors and Reactivities of 90 Thiophene Derivatives Calculated Based on Equation (2). .....3

**Table S1.** Descriptors and Reactivities of 90 Thiophene Derivatives Calculated Based on Equations (1) and (3).

| ID | $q_2 + q_5$ | $\chi_M$ | $S$    | $s_2^+ + s_5^+$ | $F$    | $\text{Log } (k/k_H)_{\text{ideal}}$ | $\text{Log } (k/k_H)_{\text{TS}}$ |
|----|-------------|----------|--------|-----------------|--------|--------------------------------------|-----------------------------------|
| 1  | -0.1180     | 3.8527   | 0.0913 | 0.0253          | 0.6865 | 0.0605                               | 0.0000                            |
| 2  | -0.0736     | 3.4369   | 0.0986 | 0.0235          | 0.6483 | 3.3446                               | 2.4047                            |
| 3  | -0.0733     | 3.4292   | 0.0996 | 0.0232          | 0.6469 | 3.4530                               | 2.4115                            |
| 4  | -0.0718     | 3.3986   | 0.1009 | 0.0233          | 0.6454 | 3.5814                               | 2.7184                            |
| 5  | -0.0944     | 4.3614   | 0.0974 | 0.0231          | 0.7138 | -1.8153                              | -2.1096                           |
| 6  | 0.0177      | 3.6603   | 0.0954 | 0.0249          | 0.6708 | 2.4228                               | 2.6027                            |
| 7  | -0.0467     | 3.7969   | 0.1003 | 0.0237          | 0.6778 | 1.3319                               | 0.5181                            |
| 8  | -0.0644     | 3.8106   | 0.1018 | 0.0233          | 0.6773 | 1.2166                               | 0.1051                            |
| 9  | -0.0810     | 4.2695   | 0.1044 | 0.0193          | 0.6954 | -0.3018                              | 0.2398                            |
| 10 | -0.0809     | 4.3626   | 0.1060 | 0.0188          | 0.7005 | -0.6832                              | -2.1275                           |
| 11 | -0.0762     | 4.6871   | 0.1082 | 0.0167          | 0.7162 | -1.8387                              | -2.4550                           |
| 12 | 0.0324      | 4.9836   | 0.1099 | 0.0232          | 0.7594 | -4.1858                              | -3.5214                           |
| 13 | -0.0370     | 2.8801   | 0.1030 | 0.0241          | 0.6039 | 7.0344                               | 7.0951                            |
| 14 | -0.0432     | 2.5027   | 0.1093 | 0.0247          | 0.5708 | 9.4962                               | 8.0032                            |
| 15 | -0.0044     | 3.0707   | 0.1005 | 0.0244          | 0.6212 | 6.0012                               | 4.7984                            |
| 16 | -0.0050     | 3.1537   | 0.0984 | 0.0247          | 0.6287 | 5.4230                               | 4.4939                            |
| 17 | -0.0445     | 4.6589   | 0.1042 | 0.0218          | 0.7292 | -2.5500                              | -2.9630                           |
| 18 | -0.0746     | 3.7015   | 0.1155 | 0.0150          | 0.6707 | 1.6304                               | 1.1771                            |
| 19 | -0.0230     | 5.2380   | 0.1098 | 0.0135          | 0.7468 | -3.7036                              | -2.9462                           |
| 20 | -0.0763     | 3.7495   | 0.1136 | 0.0176          | 0.6652 | 2.0344                               | 0.5770                            |
| 21 | -0.1279     | 3.4775   | 0.0966 | 0.0256          | 0.6597 | 2.0126                               | 1.3799                            |

|    |         |        |        |        |        |         |         |
|----|---------|--------|--------|--------|--------|---------|---------|
| 22 | -0.1282 | 3.4430 | 0.0970 | 0.0253 | 0.6554 | 2.3386  | 1.4246  |
| 23 | -0.1268 | 3.4619 | 0.0985 | 0.0249 | 0.6556 | 2.3295  | 1.1563  |
| 24 | -0.0940 | 4.4303 | 0.0922 | 0.0247 | 0.7257 | -2.7159 | -1.4554 |
| 25 | -0.1288 | 3.8374 | 0.0953 | 0.0266 | 0.6936 | -0.5719 | -0.0727 |
| 26 | -0.1119 | 3.8873 | 0.0982 | 0.0262 | 0.6968 | -0.6723 | -0.5695 |
| 27 | -0.1090 | 3.8950 | 0.0997 | 0.0262 | 0.6977 | -0.7147 | -0.6433 |
| 28 | -0.0899 | 4.1167 | 0.1003 | 0.0222 | 0.6940 | -0.2686 | -0.0284 |
| 29 | -0.0887 | 4.2275 | 0.1021 | 0.0207 | 0.6963 | -0.4299 | -0.4565 |
| 30 | -0.0873 | 4.5584 | 0.1029 | 0.0183 | 0.7095 | -1.4267 | -1.1052 |
| 31 | -0.0796 | 4.8621 | 0.1058 | 0.0177 | 0.7260 | -2.6102 | -1.4053 |
| 32 | -0.1539 | 3.0213 | 0.1035 | 0.0270 | 0.6272 | 4.2554  | 4.1446  |
| 33 | -0.1521 | 2.8344 | 0.1090 | 0.0268 | 0.6098 | 5.5961  | 4.7787  |
| 34 | -0.1455 | 3.2632 | 0.1031 | 0.0271 | 0.6500 | 2.5938  | 3.5562  |
| 35 | -0.1419 | 3.3709 | 0.0999 | 0.0270 | 0.6579 | 2.0262  | 2.4136  |
| 36 | -0.0771 | 4.5814 | 0.0998 | 0.0238 | 0.7334 | -3.1523 | -1.6306 |
| 37 | -0.1169 | 3.6490 | 0.1102 | 0.0160 | 0.6613 | 1.9801  | 0.7579  |
| 38 | -0.0768 | 5.0992 | 0.1062 | 0.0156 | 0.7354 | -3.3044 | -1.7866 |
| 39 | -0.1125 | 3.6298 | 0.1065 | 0.0193 | 0.6552 | 2.4822  | 0.5229  |
| 40 | -0.0274 | 3.6496 | 0.0943 | 0.0192 | 0.6522 | 3.4488  | 4.7428  |
| 41 | -0.0265 | 3.6435 | 0.0959 | 0.0187 | 0.6521 | 3.4619  | 4.7108  |
| 42 | -0.0233 | 3.1833 | 0.1065 | 0.0205 | 0.6243 | 5.6017  | 5.3592  |
| 43 | -0.0783 | 5.1178 | 0.0971 | 0.0199 | 0.7442 | -3.9826 | -3.7926 |
| 44 | 0.1544  | 3.6695 | 0.0959 | 0.0235 | 0.6654 | 4.0077  | 4.8704  |
| 45 | 0.0214  | 3.9382 | 0.1057 | 0.0212 | 0.6800 | 1.7514  | 0.7707  |
| 46 | -0.0154 | 3.9673 | 0.1085 | 0.0203 | 0.6803 | 1.4120  | 0.0253  |
| 47 | -0.0522 | 5.0099 | 0.1093 | 0.0155 | 0.7325 | -2.8697 | -3.9056 |
| 48 | -0.0452 | 5.6084 | 0.1100 | 0.0131 | 0.7628 | -5.1135 | -4.2072 |
| 49 | -0.0418 | 5.9600 | 0.1143 | 0.0128 | 0.7792 | -6.3316 | -5.9434 |
| 50 | 0.0526  | 2.4822 | 0.1077 | 0.0217 | 0.5664 | 10.6562 | 12.6587 |
| 51 | 0.0540  | 2.2097 | 0.1170 | 0.0216 | 0.5436 | 12.4042 | 13.5248 |
| 52 | 0.1140  | 2.7250 | 0.1009 | 0.0228 | 0.5868 | 9.6321  | 8.3709  |
| 53 | 0.0189  | 5.4732 | 0.1128 | 0.0195 | 0.7677 | -4.9358 | -5.8102 |
| 54 | -0.0312 | 3.6671 | 0.1299 | 0.0148 | 0.6748 | 1.6939  | 2.5429  |
| 55 | 0.0544  | 6.3384 | 0.1115 | 0.0111 | 0.8000 | -7.0838 | -5.0853 |
| 56 | -0.0351 | 3.7455 | 0.1283 | 0.0158 | 0.6737 | 1.7444  | 1.0287  |
| 57 | -0.0831 | 3.2741 | 0.1002 | 0.0227 | 0.6333 | 4.4022  | 3.6861  |
| 58 | -0.0838 | 3.2699 | 0.1025 | 0.0221 | 0.6322 | 4.4825  | 4.4384  |
| 59 | -0.0795 | 3.2399 | 0.1040 | 0.0220 | 0.6300 | 4.6868  | 4.0029  |
| 60 | -0.0753 | 4.8904 | 0.0975 | 0.0228 | 0.7469 | -4.1656 | -3.1680 |
| 61 | 0.0041  | 3.8228 | 0.0953 | 0.0251 | 0.6846 | 1.2552  | 2.3531  |
| 62 | -0.0445 | 4.0373 | 0.1033 | 0.0235 | 0.6956 | 0.0020  | 0.2092  |

|    |         |        |        |        |        |          |          |
|----|---------|--------|--------|--------|--------|----------|----------|
| 63 | -0.0601 | 4.0658 | 0.1058 | 0.0230 | 0.6961 | -0.1723  | -0.5058  |
| 64 | -0.0560 | 4.5459 | 0.1073 | 0.0205 | 0.7176 | -1.7691  | -0.1106  |
| 65 | -0.0570 | 4.6053 | 0.1085 | 0.0201 | 0.7199 | -1.9529  | -2.2813  |
| 66 | -0.0543 | 5.0887 | 0.1083 | 0.0170 | 0.7372 | -3.2478  | -2.8548  |
| 67 | -0.0449 | 5.5303 | 0.1104 | 0.0171 | 0.7601 | -4.9045  | -4.1015  |
| 68 | -0.0743 | 2.4962 | 0.1060 | 0.0213 | 0.5675 | 9.4823   | 10.4807  |
| 69 | -0.0733 | 2.3144 | 0.1121 | 0.0219 | 0.5518 | 10.6813  | 12.0389  |
| 70 | -0.0384 | 2.7962 | 0.1053 | 0.0245 | 0.5977 | 7.4935   | 8.9236   |
| 71 | -0.0312 | 2.9481 | 0.1007 | 0.0246 | 0.6108 | 6.5570   | 6.4025   |
| 72 | -0.0105 | 5.3509 | 0.1071 | 0.0224 | 0.7755 | -5.7789  | -4.4144  |
| 73 | -0.0743 | 3.6734 | 0.1217 | 0.0163 | 0.6659 | 2.0016   | 2.4958   |
| 74 | 0.0072  | 5.9576 | 0.1087 | 0.0149 | 0.7740 | -5.5117  | -4.4242  |
| 75 | -0.0720 | 3.7214 | 0.1178 | 0.0166 | 0.6666 | 1.9671   | 1.8826   |
| 76 | -0.0941 | 3.3649 | 0.1128 | 0.0182 | 0.6398 | 3.8178   | 2.9717   |
| 77 | -0.1319 | 3.4310 | 0.1078 | 0.0205 | 0.6431 | 3.2379   | 1.4693   |
| 78 | -0.0651 | 3.1826 | 0.1279 | 0.0146 | 0.6484 | 3.4095   | 5.1481   |
| 79 | -0.1652 | 3.0840 | 0.1153 | 0.0261 | 0.6328 | 3.7331   | 5.1076   |
| 80 | -0.0444 | 3.7489 | 0.1118 | 0.0152 | 0.6708 | 1.8879   | 2.7953   |
| 81 | -0.1211 | 3.7858 | 0.1058 | 0.0168 | 0.6657 | 1.6095   | 0.8383   |
| 82 | -0.0896 | 4.0057 | 0.1083 | 0.0180 | 0.6789 | 0.8815   | -0.0388  |
| 83 | -0.1148 | 4.0574 | 0.1053 | 0.0204 | 0.6854 | 0.1684   | 0.7939   |
| 84 | -0.0654 | 4.2510 | 0.1198 | 0.0143 | 0.7033 | -0.7629  | -0.4531  |
| 85 | -0.0266 | 4.4662 | 0.1665 | 0.0129 | 0.7384 | -3.0983  | -2.9895  |
| 86 | 0.1637  | 5.2855 | 0.1571 | 0.0174 | 0.7676 | -3.6791  | -3.9829  |
| 87 | -0.0473 | 5.1767 | 0.1711 | 0.0116 | 0.7802 | -6.4517  | -4.4167  |
| 88 | 0.1510  | 7.1324 | 0.1435 | 0.0142 | 0.8344 | -8.8620  | -12.5334 |
| 89 | -0.0083 | 3.7306 | 0.1188 | 0.0057 | 0.8921 | -14.6223 | -16.6258 |
| 90 | -0.0457 | 5.0163 | 0.1924 | 0.0187 | 0.7703 | -5.6903  | -6.6432  |

**Table S2.** Descriptors and Reactivities of 90 Thiophene Derivatives Calculated Based on Equation (2).

| ID | $q_2 + q_5$ | $\chi^M$ | $S$    | $s_2^+ + s_5^+$ | $F$    | $\text{Log } (k/k_H)_{\text{ideal}}$ | $\text{Log } (k/k_{2T})_{\text{Methanol}}$<br>Calculated |
|----|-------------|----------|--------|-----------------|--------|--------------------------------------|----------------------------------------------------------|
| 2  | -0.0814     | 3.4761   | 0.1736 | 0.0447          | 0.9029 | -16.0709                             | 0.0792                                                   |
| 3  | -0.0798     | 3.4741   | 0.1727 | 0.0430          | 0.8983 | -15.7118                             | 0.0000                                                   |
| 8  | -0.0700     | 3.7903   | 0.1785 | 0.0441          | 0.9276 | -17.8495                             | -0.6990                                                  |
| 21 | -0.1372     | 3.5208   | 0.1690 | 0.0485          | 0.9166 | -17.5942                             | -0.3010                                                  |
| 40 | -0.0347     | 3.2912   | 0.1785 | 0.0395          | 0.8776 | -13.7497                             | 1.8062                                                   |
| 42 | -0.0309     | 3.2857   | 0.1764 | 0.0360          | 0.8729 | -13.3597                             | 1.6721                                                   |
| 54 | -0.0437     | 3.7432   | 0.2285 | 0.0319          | 0.9133 | -16.5384                             | -0.0458                                                  |
| 59 | -0.0890     | 3.3121   | 0.1710 | 0.0404          | 0.8793 | -14.3460                             | 0.9031                                                   |
